# Supplementary material
Source: MDPI journal article supplement (https://www.mdpi.com/2076-3298/4/3/48)
Supplement: s2 [file s2]

# Supplementary Materials for Adsorption of Extracellular Polymeric Substances Derived from *S. cerevisiae* to Ceria Nanoparticles and the Effects on Their Colloidal Stability

Shota Masaki, Yuriko Nakano, Kenta Ichiyoshi, Keisuke Kawamoto, Ayaka Takeda, Toshihiko Ohnuki, Michael F. Hochella, Jr. and Satoshi Utsunomiya

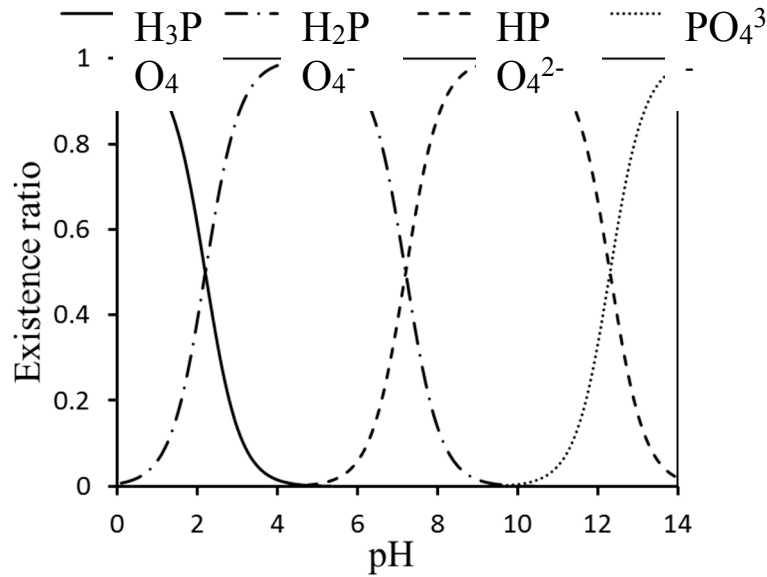

Fig. S1. Fraction of phosphate species in solution as a function of pH.

## Interpretation of particle-particle interaction by DLVO theory

The DLVO theory is a useful tool to explain the agglomeration behaviors of particles under various aqueous conditions (Derjaguin and Landau, 1941; Verwey and Overbeek, 1948). Here, the agglomeration behaviors of CeNPs are considered based on the DLVO theory. The DLVO total interaction energy ( $V_{tot}$ ) is determined by the sum of van der Waals attractive energy ( $V_{vdw}$ ) and electric double layer repulsive energy ( $V_{ele}$ ) that exist between particles as they undergo Brownian motion (Elimelech et al., 1995).

$$V_{tot} = V_{vdw} + V_{ele} \quad (S1)$$

In the case of the particle-particle interaction, the van der Waals attractive energy and electric double layer repulsive energy are expressed as the follow:

$$V_{vdw} = -\frac{A}{6D} \left( \frac{R_1 R_2}{R_1 + R_2} \right) \quad (S2)$$

$$V_{ele} = \left( \frac{R_1 R_2}{R_1 + R_2} \right) Z \exp[-\kappa D] \quad (S3)$$

$$Z = 64\pi\epsilon_0\epsilon \left( \frac{kT}{e} \right)^2 \tanh^2 \left( \frac{ze\psi_0}{4kT} \right) \quad (S4)$$

$$\kappa^{-1} = 0.304 \times 10^{-9} / \sqrt{M} \quad (\text{in case of mono electrolyte solution}) \quad (S5)$$

A (J): Hamaker constant ( $A = 5.57 \times 10^{-20}$  in case of CeO<sub>2</sub> (Karimian and Babaluo, 2007))

$R_1, R_2$  (m): Radius of two interacting particles

$D$  (m): Distance between surfaces of two interacting particles  
 $\kappa$  (m<sup>-1</sup>): Reciprocal of the thickness of the double layer  
 $\epsilon_0$  (C<sup>2</sup>J<sup>-1</sup>m<sup>-1</sup>): Electric permittivity in vacuum ( $\epsilon_0 = 8.854 \times 10^{-12}$ )  
 $\epsilon$ : Specific inductive capacity ( $\epsilon = 78.4$ , in water,  $T = 298$  K)  
 $k$ : Boltzmann constant ( $k = 1.381 \times 10^{-23}$ )  
 $T$  (K): Temperature ( $T = 298$  K)  
 $e$  (C): Quantum of electricity ( $e = 1.602 \times 10^{-19}$ )  
 $\Psi_0$  (mV): Surface potential  
 $M$  (mol L<sup>-1</sup>): Electrolyte concentration

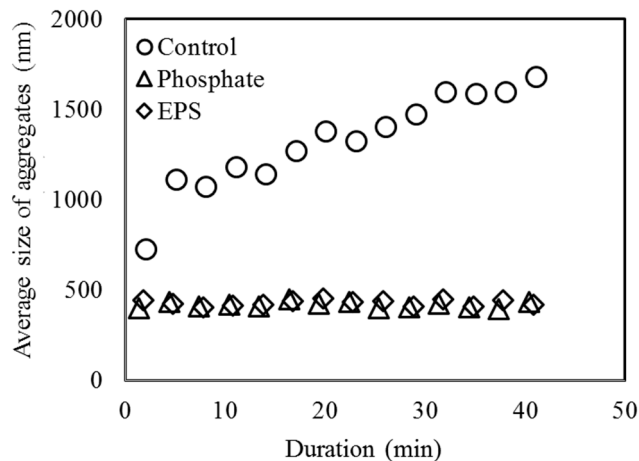

**Fig. S2.** Time-dependent variation in the average size of CeNP aggregates at 100 mg L<sup>-1</sup> CeNP concentration monitored by dynamic light scattering (DLS): (○) control solution, (Δ) inorganic orthophosphate solution, and (◇) EPS solution.

Figure S3 shows the the  $V_{\text{tot}}$  plot calculated based on the equations (S1-4) in the solution with the electrolyte concentration of 0.001 mol L<sup>-1</sup>.

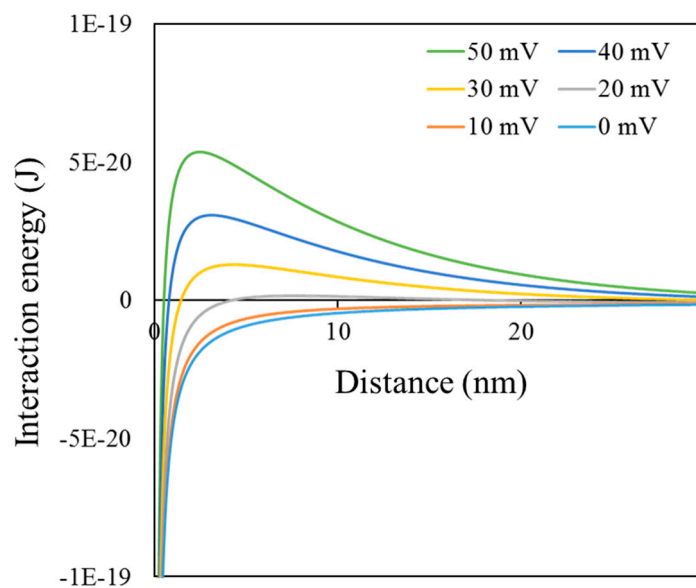

**Fig. S3.** Net energy of interaction for particles with various surface potentials at the constant ionic strength.
